# Supplementary material for: SCINOBO: a novel system classifying scholarly communication in a dynamically constructed hierarchical Field-of-Science taxonomy
Source: Front Res Metr Anal. 2023 May 4;8:1149834. doi: 10.3389/frma.2023.1149834 (PMC10192702; doi:10.3389/frma.2023.1149834)
Supplement: Supplementary file 4 [file Table_4.XLSX]

## Sheet: Sheet1
Level 5 Assigned Name	Level 5 IDs	Level 5 Topics	Level 4
fuzzy set theory	L4_artificial_intelligence_@_image_2_32	0 --> fuzzy/type/base/set/propose/algorithm/type fuzzy/interval/system/fuzzy set'	fuzzy logic/artificial neural networks/computational neuroscience
medical image analysis	L4_artificial_intelligence_@_image_2_42/L4_artificial_intelligence_@_image_2_198/L4_artificial_intelligence_@_image_2_147/L4_artificial_intelligence_@_image_2_2/L4_artificial_intelligence_@_image_2_185	0 --> image/segmentation/tumor/base/brain/propose/network/feature/classification/result', '1 --> image/lung/chest/propose/tb/tuberculosis/ray/segmentation/result/detection', '2 --> segmentation/image/network/breast/deep/propose/tumor/feature/base/medical', '3 --> vessel/image/retinal/segmentation/propose/fundus/detection/blood/vessel segmentation/blood vessel', '4 --> segmentation/image/tumor/bra…	fuzzy logic/artificial neural networks/computational neuroscience
state estimation with neural networks	L4_artificial_intelligence_@_image_2_43	0 --> network/delay/time/neural network/neural/estimation/state/state estimation/stochastic/problem'	fuzzy logic/artificial neural networks/computational neuroscience
adaptive neural nonlinear systems with feedback control and finite time	L4_artificial_intelligence_@_image_2_6	0 --> control/time/finite/finite time/adaptive/system/nonlinear/neural/nonlinear system/feedback'	fuzzy logic/artificial neural networks/computational neuroscience
petri net-based robust control systems	L4_artificial_intelligence_@_image_2_199	0 --> resource/system/control/deadlock/net/petri/petri net/propose/time/robust'	fuzzy logic/artificial neural networks/computational neuroscience
deep learning	L4_artificial_intelligence_@_image_12_26/L4_artificial_intelligence_@_image_12_63/L4_artificial_intelligence_@_image_12_2	0 --> disease/image/plant/classification/cell/feature/network/neural/neural network/technique', '1 --> image/learning/base/propose/deep/technique/accuracy/network/feature/classification', '2 --> base/blood/network/pressure/propose/blood pressure/feature/bp/deep/result'	Medical monitoring/Telehealth
adaptive dynamic nonlinear control systems	L4_artificial_intelligence_@_image_2_51	0 --> control/system/propose/nonlinear/network/base/optimal/time/dynamic/adaptive'	fuzzy logic/artificial neural networks/computational neuroscience
neural network learning	L4_artificial_intelligence_@_image_2_105	0 --> propose/network/base/algorithm/datum/neural/result/neural network/learning/time'	fuzzy logic/artificial neural networks/computational neuroscience
fuzzy rough set theory	L4_artificial_intelligence_@_image_2_39	0 --> feature/fuzzy/selection/label/rough/feature selection/fuzzy rough/set/rough set/classification'	fuzzy logic/artificial neural networks/computational neuroscience
fuzzy machine learning	L4_artificial_intelligence_@_image_2_55	0 --> fuzzy/base/learning/machine/datum/extreme learning machine/learning machine/extreme/extreme learning/problem'	fuzzy logic/artificial neural networks/computational neuroscience
fuzzy logic control systems	L4_artificial_intelligence_@_image_2_70/L4_artificial_intelligence_@_image_2_192	0 --> slide/mode/slide mode/control/fuzzy/slide mode control/mode control/base/system/singular', '1 --> control/fuzzy/system/propose/adaptive/controller/time/function/nonlinear/design'	fuzzy logic/artificial neural networks/computational neuroscience
fuzzy adaptive control systems design	L4_artificial_intelligence_@_image_2_208	0 --> fault/control/fuzzy/system/adaptive/propose/design/time/tolerant/estimation'	fuzzy logic/artificial neural networks/computational neuroscience
fuzzy linguistic classification systems learning	L4_artificial_intelligence_@_image_2_36	0 --> fuzzy/linguistic/propose/type/datum/base/system/learning/classification/network'	fuzzy logic/artificial neural networks/computational neuroscience
extreme learning machine (elm) classification	L4_artificial_intelligence_@_image_2_21	0 --> elm/learning/machine/propose/base/algorithm/extreme/classification/learning machine/extreme learning machine'	fuzzy logic/artificial neural networks/computational neuroscience
magnetic particle imaging (mpi) reconstruction	L4_artificial_intelligence_@_image_2_3	0 --> mpi/magnetic/imaging/image/particle/magnetic particle/field/particle imaging/magnetic particle imaging/reconstruction'	fuzzy logic/artificial neural networks/computational neuroscience
fuzzy logic decision making	L4_artificial_intelligence_@_image_2_8	0 --> fuzzy/decision/linguistic/propose/base/preference/make/decision make/relation/preference relation'	fuzzy logic/artificial neural networks/computational neuroscience
fuzzy logic/fuzzy systems	L4_artificial_intelligence_@_image_2_61	0 --> domain/propose/learning/datum/base/transfer/learn/feature/fuzzy/target'	fuzzy logic/artificial neural networks/computational neuroscience
echo state networks (esn)	L4_artificial_intelligence_@_image_2_19	0 --> network/propose/state/time/feature/base/echo/echo state/prediction/series'	fuzzy logic/artificial neural networks/computational neuroscience
fuzzy neural network adaptive control	L4_artificial_intelligence_@_image_2_73	0 --> control/network/neural/adaptive/neural network/propose/controller/base/fuzzy/time'	fuzzy logic/artificial neural networks/computational neuroscience
cluster analysis and fuzzy logic	L4_artificial_intelligence_@_image_2_20	0 --> algorithm/datum/cluster/fuzzy/propose/base/image/information/network/result'	fuzzy logic/artificial neural networks/computational neuroscience
neural network/deep learning	L4_artificial_intelligence_@_image_2_102	0 --> network/algorithm/neural/neural network/complex/value/gradient/propose/convergence/training'	fuzzy logic/artificial neural networks/computational neuroscience
fuzzy rule-based classification	L4_artificial_intelligence_@_image_2_25	0 --> learning/bls/fuzzy/rule/propose/base/network/feature/datum/classification'	fuzzy logic/artificial neural networks/computational neuroscience
neural network artificial intelligence	L4_artificial_intelligence_@_image_2_294	0 --> network/neural/neural network/solve/problem/equation/fractional/solution/derivative/order'	fuzzy logic/artificial neural networks/computational neuroscience
neural network modeling	L4_artificial_intelligence_@_image_2_4	0 --> time/neural/matrix/network/neural network/znn/propose/vary/solve/model'	fuzzy logic/artificial neural networks/computational neuroscience
fuzzy clustering	L4_artificial_intelligence_@_image_2_256	0 --> cluster/fuzzy/datum/algorithm/propose/mean/clustering/fuzzy mean/base/cluster algorithm'	fuzzy logic/artificial neural networks/computational neuroscience
fractional order neural networks	L4_artificial_intelligence_@_image_2_1	0 --> fractional/order/fractional order/network/delay/neural network/neural/synchronization/bifurcation/time'	fuzzy logic/artificial neural networks/computational neuroscience
fuzzy logic and neural networks	L4_artificial_intelligence_@_image_2_15	0 --> function/network/activation/activation function/neural/propose/neural network/base/algorithm/fuzzy'	fuzzy logic/artificial neural networks/computational neuroscience
fuzzy systems design	L4_artificial_intelligence_@_image_2_169	0 --> control/fuzzy/design/base/system/propose/uncertainty/constraint/performance/robust'	fuzzy logic/artificial neural networks/computational neuroscience
electrical impedance tomography (eit) reconstruction	L4_artificial_intelligence_@_image_2_131	0 --> eit/electrical/impedance/electrical impedance/image/tomography/reconstruction/electrical impedance tomography/impedance tomography/measurement'	fuzzy logic/artificial neural networks/computational neuroscience
fuzzy classification learning algorithms	L4_artificial_intelligence_@_image_2_37	0 --> propose/base/problem/learning/classification/fuzzy/datum/algorithm/learn/network'	fuzzy logic/artificial neural networks/computational neuroscience
fuzzy control systems	L4_artificial_intelligence_@_image_2_0	0 --> fuzzy/control/system/base/controller/design/time/stability/delay/propose'	fuzzy logic/artificial neural networks/computational neuroscience
facial recognition	L4_artificial_intelligence_@_image_5_24	0 --> face/recognition/image/feature/face recognition/propose/base/algorithm/facial/result'	Biometrics/Authentication methods
video summarization	L4_artificial_intelligence_@_image_5_81	0 --> video/frame/propose/base/summarization/feature/video summarization/detection/extraction/boundary'	Biometrics/Authentication methods
image watermarking	L4_artificial_intelligence_@_image_5_6	0 --> image/watermarking/watermark/propose/base/watermarke/scheme/algorithm/attack/embed'	Biometrics/Authentication methods
automatic license plate recognition (alpr)	L4_artificial_intelligence_@_image_5_30	0 --> plate/license plate/license/image/propose/detection/recognition/algorithm/base/datum'	Biometrics/Authentication methods
image segmentation	L4_artificial_intelligence_@_image_5_130/L4_artificial_intelligence_@_image_5_15	0 --> point/approximation/detection/polygonal/base/algorithm/polygonal approximation/propose/image/segmentation', '1 --> image/segmentation/algorithm/color/image segmentation/base/propose/cluster/pixel/fuzzy'	Biometrics/Authentication methods
image forgery detection	L4_artificial_intelligence_@_image_5_19	0 --> image/forgery/detection/copy/forgery detection/feature/base/propose/copy forgery/image forgery'	Biometrics/Authentication methods
fabric defect detection using image processing and deep learning	L4_artificial_intelligence_@_image_5_115	0 --> defect/fabric/detection/fabric defect/defect detection/image/base/fabric defect detection/network/propose'	Biometrics/Authentication methods
clustering/cluster analysis	L4_artificial_intelligence_@_image_5_32	0 --> cluster/datum/propose/feature/algorithm/base/learn/result/clustering/graph'	Biometrics/Authentication methods
biometric identification and recognition	L4_artificial_intelligence_@_image_5_18	0 --> fingerprint/image/base/propose/feature/database/recognition/minutia/biometric/identification'	Biometrics/Authentication methods
multi-label classification	L4_artificial_intelligence_@_image_5_140	0 --> label/multi label/multi/feature/feature selection/classification/selection/multi label classification/label classification/base'	Biometrics/Authentication methods
facial expression recognition	L4_artificial_intelligence_@_image_5_8	0 --> facial/expression/facial expression/recognition/feature/expression recognition/facial expression recognition/emotion/propose/base'	Biometrics/Authentication methods
video compression algorithms	L4_artificial_intelligence_@_image_5_86	0 --> code/hevc/video/mode/base/intra/algorithm/propose/decision/fast'	Biometrics/Authentication methods
image segmentation using hierarchical algorithms and graph-	L4_artificial_intelligence_@_image_5_13	0 --> image/segmentation/hierarchical/algorithm/base/tree/watershed/object/graph/propose'	Biometrics/Authentication methods
evolutionary optimization	L4_artificial_intelligence_@_image_5_80	0 --> algorithm/differential/evolution/differential evolution/adaptive/parameter/novel/base/evolutionary/optimization'	Biometrics/Authentication methods
image processing and computer vision	L4_artificial_intelligence_@_image_5_103/L4_artificial_intelligence_@_image_5_59	0 --> image/enhancement/histogram/contrast/propose/algorithm/base/adaptive/improve/feature', '1 --> algorithm/image/processing/architecture/fpga/base/time/high/detection/hardware'	Biometrics/Authentication methods
digital forensics	L4_artificial_intelligence_@_image_5_27	0 --> forensic/digital/digital forensic/tool/datum/investigation/process/database/base/evidence'	Biometrics/Authentication methods
biometric authentication security	L4_artificial_intelligence_@_image_5_22	0 --> biometric/template/fingerprint/propose/cancelable/authentication/base/security/user/protection'	Biometrics/Authentication methods
handwritten character recognition	L4_artificial_intelligence_@_image_5_25	0 --> recognition/character/handwritten/feature/propose/network/base/image/dataset/character recognition'	Biometrics/Authentication methods
3d face recognition	L4_artificial_intelligence_@_image_5_56	0 --> face/recognition/face recognition/3d/3d face/3d face recognition/base/pose/expression/2d'	Biometrics/Authentication methods
facial recognition and pattern classification	L4_artificial_intelligence_@_image_5_28	0 --> image/propose/feature/base/texture/face/classification/local/recognition/pattern'	Biometrics/Authentication methods
image compression and security	L4_artificial_intelligence_@_image_5_11	0 --> image/compression/encryption/scheme/propose/compressive/matrix/base/algorithm/security'	Biometrics/Authentication methods
video anomaly detection for crowd surveillance	L4_artificial_intelligence_@_image_5_17	0 --> detection/video/anomaly/crowd/propose/abnormal/behavior/anomaly detection/dataset/surveillance'	Biometrics/Authentication methods
biometric recognition	L4_artificial_intelligence_@_image_5_51/L4_artificial_intelligence_@_image_5_45/L4_artificial_intelligence_@_image_5_47	0 --> iris/recognition/base/image/propose/feature/biometric/iris recognition/segmentation/result', '1 --> feature/finger/image/recognition/vein/base/biometric/propose/finger vein/palmprint', '2 --> recognition/iris/biometric/attack/face/base/presentation/presentation attack/iris recognition/feature'	Biometrics/Authentication methods
biometric authentication and signature verification	L4_artificial_intelligence_@_image_5_1	0 --> signature/feature/verification/base/signature verification/propose/result/image/online/dataset'	Biometrics/Authentication methods
object detection and surveillance algorithms	L4_artificial_intelligence_@_image_5_38	0 --> video/detection/object/algorithm/move/camera/propose/surveillance/move object/base'	Biometrics/Authentication methods
document image analysis	L4_artificial_intelligence_@_image_5_87	0 --> image/binarization/document/document image/propose/result/character/text/image binarization/degrade'	Biometrics/Authentication methods
medical image fusion	L4_artificial_intelligence_@_image_5_3	0 --> image/fusion/medical/medical image/image fusion/medical image fusion/propose/base/fuse/information'	Biometrics/Authentication methods
super resolution image processing	L4_artificial_intelligence_@_image_5_29	0 --> resolution/image/super resolution/super/resolution image/base/regularization/approach/high resolution/algorithm'	Biometrics/Authentication methods
image recognition/computer vision	L4_artificial_intelligence_@_image_5_37	0 --> leaf/plant/shape/feature/image/descriptor/identification/specie/recognition/base'	Biometrics/Authentication methods
image recognition and detection	L4_artificial_intelligence_@_image_5_65	0 --> base/propose/feature/image/recognition/network/datum/detection/result/time'	Biometrics/Authentication methods
clustering algorithms	L4_artificial_intelligence_@_image_5_68	0 --> cluster/algorithm/density/base/datum/propose/result/clustering/cluster algorithm/index'	Biometrics/Authentication methods
graph edit distance learning	L4_artificial_intelligence_@_image_5_33	0 --> graph/edit/distance/graph edit/node/edit distance/graph edit distance/cost/learn/base'	Biometrics/Authentication methods
image recognition and deep learning retrieval	L4_artificial_intelligence_@_image_5_7	0 --> image/base/propose/network/feature/result/point/retrieval/recognition/deep'	Biometrics/Authentication methods
ensemble classification	L4_artificial_intelligence_@_image_5_39	0 --> ensemble/classifier/base/propose/classification/datum/outlier/performance/detection/class'	Biometrics/Authentication methods
deep learning/deep neural network	L4_artificial_intelligence_@_image_5_2	0 --> feature/image/base/propose/classification/network/brain/result/recognition/deep'	Biometrics/Authentication methods
image processing and restoration	L4_artificial_intelligence_@_image_5_0	0 --> image/propose/total/variation/base/total variation/denoising/noise/restoration/non'	Biometrics/Authentication methods
face recognition and multi-class classification	L4_artificial_intelligence_@_image_5_165	0 --> face/recognition/learning/face recognition/feature/multi/classification/propose/sensitive/learn'	Biometrics/Authentication methods
biometric authentication	L4_artificial_intelligence_@_image_5_67	0 --> eye/biometric/feature/authentication/movement/eye movement/gait/rate/blink/pattern'	Biometrics/Authentication methods
image retrieval and content-based image retrieval	L4_artificial_intelligence_@_image_5_21	0 --> image/retrieval/base/feature/image retrieval/content/semantic/base image/propose/base image retrieval'	Biometrics/Authentication methods
hand gesture recognition	L4_artificial_intelligence_@_image_5_41	0 --> gesture/recognition/feature/hand/base/gesture recognition/image/propose/human/hand gesture'	Biometrics/Authentication methods
gesture recognition and image classification	L4_artificial_intelligence_@_image_5_123	0 --> feature/image/recognition/base/human/propose/hand/classification/gesture/algorithm'	Biometrics/Authentication methods
visual object tracking	L4_artificial_intelligence_@_image_5_75	0 --> tracking/object/track/visual/base/feature/visual tracking/object track/algorithm/time'	Biometrics/Authentication methods
image recognition and classification	L4_artificial_intelligence_@_image_5_23	0 --> feature/base/propose/image/detection/datum/recognition/classification/algorithm/learning'	Biometrics/Authentication methods
handwriting recognition/writer identification using artificial intelligence	L4_artificial_intelligence_@_image_5_9	0 --> writer/feature/identification/base/propose/writer identification/handwriting/image/text/result'	Biometrics/Authentication methods
gesture recognition	L4_artificial_intelligence_@_image_12_21	0 --> gesture/signal/recognition/hand/semg/feature/base/propose/network/classification'	Medical monitoring/Telehealth
crowdsourced blockchain artificial intelligence	L4_artificial_intelligence_@_image_12_56	0 --> blockchain/datum/base/propose/crowdsourcing/contract/mechanism/traffic/privacy/crowdsource'	Medical monitoring/Telehealth
fog computing	L4_artificial_intelligence_@_image_12_18	0 --> iot/service/cloud/device/base/datum/network/computing/propose/fog'	Medical monitoring/Telehealth
wearable activity detection and monitoring	L4_artificial_intelligence_@_image_12_123	0 --> sensor/intake/eat/food/wearable/detection/activity/detect/algorithm/datum'	Medical monitoring/Telehealth
wireless sensor network algorithms	L4_artificial_intelligence_@_image_12_28	0 --> energy/network/sensor/node/base/propose/wireless/algorithm/cluster/datum'	Medical monitoring/Telehealth
wireless sensor networking	L4_artificial_intelligence_@_image_12_65	0 --> network/energy/underwater/node/protocol/sensor/sensor network/routing/packet/route'	Medical monitoring/Telehealth
high performance computing (hpc)	L4_artificial_intelligence_@_image_12_173	0 --> hpc/system/storage/datum/workload/buffer/scheduling/performance/burst/burst buffer'	Medical monitoring/Telehealth
cloud resource scheduling and optimization	L4_artificial_intelligence_@_image_12_69	0 --> task/algorithm/scheduling/cloud/resource/propose/base/energy/optimization/service'	Medical monitoring/Telehealth
systems engineering and model-based systems engineering (mbse)	L4_artificial_intelligence_@_image_12_29	0 --> base/engineering/mbse/system/requirement/system engineering/process/framework/model/architecture'	Medical monitoring/Telehealth
medical blockchain	L4_artificial_intelligence_@_image_12_47	0 --> datum/healthcare/patient/medical/health/blockchain/base/privacy/scheme/cloud'	Medical monitoring/Telehealth
iot security	L4_artificial_intelligence_@_image_12_101	0 --> network/iot/base/datum/internet/sensor/propose/trust/thing/security'	Medical monitoring/Telehealth
human activity recognition	L4_artificial_intelligence_@_image_12_10	0 --> activity/recognition/human/sensor/activity recognition/human activity/datum/base/propose/human activity recognition'	Medical monitoring/Telehealth
iot network security	L4_artificial_intelligence_@_image_12_55	0 --> network/iot/energy/propose/service/base/datum/technology/sensor/security'	Medical monitoring/Telehealth
parallel computing	L4_artificial_intelligence_@_image_12_104	0 --> performance/mpi/application/communication/energy/parallel/datum/processor/time/thread'	Medical monitoring/Telehealth
smart agriculture or agricultural iot (internet of things)	L4_artificial_intelligence_@_image_12_35	0 --> agriculture/iot/agricultural/smart/technology/farming/crop/thing/base/internet'	Medical monitoring/Telehealth
medical machine learning	L4_artificial_intelligence_@_image_12_40	0 --> machine/learning/datum/prediction/disease/accuracy/machine learning/diabetes/covid/diabete'	Medical monitoring/Telehealth
fault diagnosis	L4_artificial_intelligence_@_image_12_51	0 --> fault/signal/bearing/diagnosis/propose/bear/fault diagnosis/base/roll/condition'	Medical monitoring/Telehealth
internet of things (iot) security	L4_artificial_intelligence_@_image_12_114	0 --> network/iot/base/attack/rpl/energy/propose/internet/sensor/protocol'	Medical monitoring/Telehealth
network monitoring and information health	L4_artificial_intelligence_@_image_12_37	0 --> sensor/base/monitoring/information/datum/driver/health/propose/method/network'	Medical monitoring/Telehealth
emotion recognition	L4_artificial_intelligence_@_image_12_33	0 --> emotion/eeg/recognition/feature/emotion recognition/signal/base/propose/eeg signal/classification'	Medical monitoring/Telehealth
cloud computing and scheduling algorithms	L4_artificial_intelligence_@_image_12_60	0 --> cloud/algorithm/scheduling/task/load/resource/balance/load balance/propose/time'	Medical monitoring/Telehealth
medical diagnosis using machine learning	L4_artificial_intelligence_@_image_12_34	0 --> heart/sound/heart sound/signal/feature/classification/propose/base/pcg/disease'	Medical monitoring/Telehealth
deep learning for intrusion detection	L4_artificial_intelligence_@_image_12_49	0 --> network/detection/intrusion/deep/intrusion detection/learning/attack/base/deep learning/dataset'	Medical monitoring/Telehealth
edge computing	L4_artificial_intelligence_@_image_12_15	0 --> datum/network/iot/base/device/service/edge/propose/security/computing'	Medical monitoring/Telehealth
smart home technology	L4_artificial_intelligence_@_image_12_57	0 --> home/smart/smart home/base/iot/security/technology/monitor/internet/environment'	Medical monitoring/Telehealth
epileptic seizure detection	L4_artificial_intelligence_@_image_12_6	0 --> eeg/signal/seizure/feature/classification/eeg signal/propose/epileptic/base/detection'	Medical monitoring/Telehealth
medical security artificial intelligence	L4_artificial_intelligence_@_image_12_43	0 --> authentication/scheme/security/propose/user/medical/secure/attack/protocol/propose scheme'	Medical monitoring/Telehealth
cloud computing and edge network algorithms	L4_artificial_intelligence_@_image_12_61	0 --> edge/service/propose/algorithm/base/network/computing/cloud/datum/user'	Medical monitoring/Telehealth
fault diagnosis in artificial intelligence	L4_artificial_intelligence_@_image_12_27	0 --> fault/diagnosis/propose/feature/fault diagnosis/base/signal/bear/datum/bearing'	Medical monitoring/Telehealth
smart city security scheme	L4_artificial_intelligence_@_image_12_48	0 --> datum/privacy/cloud/smart/security/scheme/data/propose/service/city'	Medical monitoring/Telehealth
networked communication technology artificial intelligence	L4_artificial_intelligence_@_image_12_97	0 --> datum/base/network/energy/propose/data/technology/communication/time/body'	Medical monitoring/Telehealth
iot-enabled healthcare artificial intelligence	L4_artificial_intelligence_@_image_12_0	0 --> base/iot/propose/datum/health/healthcare/network/sensor/internet/time'	Medical monitoring/Telehealth
wireless indoor localization	L4_artificial_intelligence_@_image_12_82	0 --> indoor/wi/wi fi/fi/position/base/algorithm/localization/fingerprint/propose'	Medical monitoring/Telehealth
wireless sensor networks	L4_artificial_intelligence_@_image_12_59	0 --> network/energy/sensor/cluster/node/base/wireless/algorithm/sensor network/wireless sensor'	Medical monitoring/Telehealth
knowledge representation and reasoning	L4_artificial_intelligence_@_image_9_2/L4_artificial_intelligence_@_image_9_56	0 --> knowledge/bert/entity/graph/task/base/language/knowledge graph/information/representation', '1 --> knowledge/question/answer/base/entity/question answer/propose/knowledge base/relation/graph'	natural language processing/computational linguistics
keyphrase extraction	L4_artificial_intelligence_@_image_9_33	0 --> extraction/keyphrase/document/keyword/base/text/keyphrase extraction/graph/information/propose'	natural language processing/computational linguistics
authorship attribution	L4_artificial_intelligence_@_image_9_78	0 --> authorship/text/attribution/feature/task/authorship attribution/language/base/cross/propose'	natural language processing/computational linguistics
word embedding	L4_artificial_intelligence_@_image_9_64	0 --> word/embedding/language/task/embed/word embedding/representation/model/learn/subword'	natural language processing/computational linguistics
adversarial natural language processing	L4_artificial_intelligence_@_image_9_0	0 --> model/adversarial/attack/base/word/propose/text/language/essay/task'	natural language processing/computational linguistics
sentiment analysis	L4_artificial_intelligence_@_image_9_28/L4_artificial_intelligence_@_image_9_1	0 --> text/sentiment/word/classification/domain/learning/lexicon/emotion/language/label', '1 --> sentiment/aspect/base/opinion/review/resource/text/dataset/mining/propose'	natural language processing/computational linguistics
dialogue systems/natural language processing	L4_artificial_intelligence_@_image_9_13	0 --> state/slot/domain/dialogue/dialogue state/dst/value/multiwoz/tracking/multi'	natural language processing/computational linguistics
distributional semantics/computational lexical semantics	L4_artificial_intelligence_@_image_9_48	0 --> semantic/entailment/distributional/textual entailment/textual/language/model/information/word/base'	natural language processing/computational linguistics
grammatical error correction (gec)	L4_artificial_intelligence_@_image_9_51	0 --> error/gec/correction/grammatical/grammatical error/error correction/datum/grammatical error correction/language/model'	natural language processing/computational linguistics
knowledge graph embedding	L4_artificial_intelligence_@_image_9_29	0 --> graph/knowledge/knowledge graph/entity/relation/embed/base/propose/network/embedding'	natural language processing/computational linguistics
event extraction and detection	L4_artificial_intelligence_@_image_9_9	0 --> event/extraction/argument/event extraction/detection/event detection/trigger/ed/type/event argument'	natural language processing/computational linguistics
machine translation	L4_artificial_intelligence_@_image_9_76/L4_artificial_intelligence_@_image_9_19	0 --> translation/parallel/language/comparable/corpora/english/machine/phrase/machine translation/corpus', '1 --> translation/machine/language/machine translation/neural/model/task/datum/english/quality'	natural language processing/computational linguistics
emotion cause extraction	L4_artificial_intelligence_@_image_9_39	0 --> emotion/cause/emotion cause/clause/extraction/task/propose/base/method/pair'	natural language processing/computational linguistics
stance detection	L4_artificial_intelligence_@_image_9_41	0 --> stance/debate/political/sentiment/classification/detection/dataset/stance detection/task/tweet'	natural language processing/computational linguistics
question answering and question generation	L4_artificial_intelligence_@_image_9_4	0 --> question/answer/generation/generate/question generation/question answer/qa/medical/base/dataset'	natural language processing/computational linguistics
word sense disambiguation (wsd)	L4_artificial_intelligence_@_image_9_36	0 --> sense/word/word sense/language/disambiguation/sense disambiguation/word sense disambiguation/wsd/semantic/base'	natural language processing/computational linguistics
news recommendation systems	L4_artificial_intelligence_@_image_9_68	0 --> user/news/paper/sentiment/recommendation/attention/term/news recommendation/propose/result'	natural language processing/computational linguistics
name entity recognition (ner)	L4_artificial_intelligence_@_image_9_26	0 --> entity/name/name entity/ner/entity recognition/recognition/name entity recognition/model/task/dataset'	natural language processing/computational linguistics
sentiment detection	L4_artificial_intelligence_@_image_9_260	0 --> topic/sentiment/text/base/user/model/propose/detection/event/word'	natural language processing/computational linguistics
opinion mining/sentiment analysis	L4_artificial_intelligence_@_image_9_86	0 --> review/feature/sentiment/document/user/propose/detection/classification/opinion/network'	natural language processing/computational linguistics
neural machine translation (nmt)	L4_artificial_intelligence_@_image_9_24	0 --> translation/machine/machine translation/language/neural/nmt/neural machine translation/neural machine/base/resource'	natural language processing/computational linguistics
sentiment analysis of arabic text	L4_artificial_intelligence_@_image_9_80	0 --> sentiment/arabic/language/word/propose/lexicon/base/result/classification/text'	natural language processing/computational linguistics
argument mining	L4_artificial_intelligence_@_image_9_23	0 --> argument/argumentation/mining/annotation/task/argumentative/argument mining/corpus/claim/annotate'	natural language processing/computational linguistics
text mining and information retrieval	L4_artificial_intelligence_@_image_9_17	0 --> legal/law/ai/text/word/information/document/paper/artificial/base'	natural language processing/computational linguistics
text simplification/sentence simplification	L4_artificial_intelligence_@_image_9_44	0 --> simplification/sentence/text/text simplification/sentence simplification/lexical/dataset/base/word/level'	natural language processing/computational linguistics
semantic parsing	L4_artificial_intelligence_@_image_9_59/L4_artificial_intelligence_@_image_9_123	0 --> graph/semantic/parse/amr/representation/tree/model/dag/parser/mean', '1 --> semantic/task/language/user/dataset/natural/parse/natural language/parser/instruction'	natural language processing/computational linguistics
natural language generation	L4_artificial_intelligence_@_image_9_105/L4_artificial_intelligence_@_image_9_6	0 --> story/generate/narrative/human/domain/planning/propose/model/generation/comment', '1 --> text/generation/text generation/generate/entity/content/neural/model/end/datum'	natural language processing/computational linguistics
dependency parsing	L4_artificial_intelligence_@_image_9_7	0 --> parse/dependency/parser/base/tree/language/graph/dependency parse/model/transition'	natural language processing/computational linguistics
deep learning/neural network classification	L4_artificial_intelligence_@_image_9_45	0 --> word/text/base/task/feature/propose/network/classification/attention/result'	natural language processing/computational linguistics
text classification	L4_artificial_intelligence_@_image_9_91	0 --> text/classification/hierarchical/label/base/text classification/phrase/structure/propose/semantic'	natural language processing/computational linguistics
clinical natural language processing	L4_artificial_intelligence_@_image_9_27	0 --> task/text/sentence/classification/representation/label/clinical/result/information/datum'	natural language processing/computational linguistics
text summarization	L4_artificial_intelligence_@_image_9_3	0 --> summarization/text/summary/sentence/document/base/propose/information/dataset/model'	natural language processing/computational linguistics
semantic network modeling	L4_artificial_intelligence_@_image_9_50	0 --> task/sentence/language/text/propose/model/question/semantic/base/network'	natural language processing/computational linguistics
neural network natural language processing (nnnlp)	L4_artificial_intelligence_@_image_9_16	0 --> negation/task/sentiment/base/word/network/neural/language/model/result'	natural language processing/computational linguistics
corpus-based sentiment analysis	L4_artificial_intelligence_@_image_9_138	0 --> language/word/text/datum/corpus/task/pos/base/feature/sentiment'	natural language processing/computational linguistics
temporal knowledge representation and reasoning	L4_artificial_intelligence_@_image_9_20	0 --> event/temporal/relation/time/information/subevent/knowledge/duration/model/temporal relation'	natural language processing/computational linguistics
deep learning/neural network-based natural language processing	L4_artificial_intelligence_@_image_9_37	0 --> network/sentiment/neural/attention/neural network/base/classification/answer/question/propose'	natural language processing/computational linguistics
gender bias in natural language processing (nlp)	L4_artificial_intelligence_@_image_9_15	0 --> bias/gender/language/word/embedding/word embedding/gender bias/nlp/model/fairness'	natural language processing/computational linguistics
multimodal emotion and sentiment recognition	L4_artificial_intelligence_@_image_9_22	0 --> emotion/sentiment/task/propose/multimodal/recognition/multi/dataset/modal/network'	natural language processing/computational linguistics
hate speech detection in social online media	L4_artificial_intelligence_@_image_9_30	0 --> hate/speech/hate speech/detection/dataset/abusive/speech detection/hate speech detection/social/online'	natural language processing/computational linguistics
association rule mining	L4_artificial_intelligence_@_image_0_31	0 --> rule/association/association rule/mining/algorithm/fuzzy/rule mining/association rule mining/propose/base'	mathematical optimization/evolutionary algorithms
decision support systems	L4_artificial_intelligence_@_image_0_107	0 --> supplier/propose/rank/decision/company/dea/base/evaluation/object/error'	mathematical optimization/evolutionary algorithms
bayesian machine learning	L4_artificial_intelligence_@_image_0_53	0 --> algorithm/bayesian/network/structure/bayesian network/learn/propose/search/base/datum'	mathematical optimization/evolutionary algorithms
optimization in transportation problem solving	L4_artificial_intelligence_@_image_0_11	0 --> problem/fuzzy/propose/algorithm/solution/base/optimization/objective/transportation/solve'	mathematical optimization/evolutionary algorithms
fuzzy logic classification	L4_artificial_intelligence_@_image_0_36	0 --> optimization/algorithm/propose/base/datum/fuzzy/classification/problem/network/selection'	mathematical optimization/evolutionary algorithms
network security and intrusion detection	L4_artificial_intelligence_@_image_0_4	0 --> detection/intrusion/network/intrusion detection/base/attack/feature/propose/algorithm/security'	mathematical optimization/evolutionary algorithms
deep learning for chest image detection	L4_artificial_intelligence_@_image_0_22	0 --> covid/19/covid 19/image/ray/deep/chest/propose/learning/detection'	mathematical optimization/evolutionary algorithms
neutrosophic artificial intelligence	L4_artificial_intelligence_@_image_0_65	0 --> neutrosophic/triplet/ideal/group/groupoid/extend/quadruple/ag/neutrosophic quadruple/neutrosophic extend triplet'	mathematical optimization/evolutionary algorithms
network algorithms and performance optimization	L4_artificial_intelligence_@_image_0_54	0 --> algorithm/base/problem/propose/layout/network/feature/performance/result/paper'	mathematical optimization/evolutionary algorithms
neural network intelligence	L4_artificial_intelligence_@_image_0_75	0 --> prediction/network/energy/hybrid/neural/cell/power/neural network/intelligent/obtain'	mathematical optimization/evolutionary algorithms
customer churn prediction	L4_artificial_intelligence_@_image_0_19	0 --> customer/churn/prediction/churn prediction/customer churn/company/datum/service/telecom/base'	mathematical optimization/evolutionary algorithms
fuzzy logic and multi-criteria decision making	L4_artificial_intelligence_@_image_0_9	0 --> problem/base/algorithm/propose/uncertain/fuzzy/multi/network/paper/decision'	mathematical optimization/evolutionary algorithms
pattern recognition and machine learning	L4_artificial_intelligence_@_image_0_63	0 --> base/feature/propose/algorithm/recognition/network/result/classification/datum/activity'	mathematical optimization/evolutionary algorithms
fuzzy graph theory	L4_artificial_intelligence_@_image_0_67	0 --> graph/fuzzy/fuzzy graph/connectivity/edge/index/network/node/type/vertex'	mathematical optimization/evolutionary algorithms
adaptive fuzzy control systems	L4_artificial_intelligence_@_image_0_56	0 --> fuzzy/control/system/base/nonlinear/time/controller/propose/design/adaptive'	mathematical optimization/evolutionary algorithms
fuzzy logic optimization	L4_artificial_intelligence_@_image_0_5/L4_artificial_intelligence_@_image_0_16	0 --> base/algorithm/problem/propose/fuzzy/network/time/datum/optimization/result', '1 --> algorithm/cluster/propose/base/fuzzy/image/result/optimization/mean/datum'	mathematical optimization/evolutionary algorithms
multi-agent systems	L4_artificial_intelligence_@_image_0_64	0 --> agent/system/multi/multi agent/base/semantic/propose/paper/commitment/information'	mathematical optimization/evolutionary algorithms
fault diagnosis in condition monitoring using artificial intelligence	L4_artificial_intelligence_@_image_0_18	0 --> fault/diagnosis/fault diagnosis/feature/signal/propose/base/bear/vibration/condition'	mathematical optimization/evolutionary algorithms
control theory and optimization	L4_artificial_intelligence_@_image_0_100	0 --> controller/control/pid/algorithm/pid controller/parameter/propose/tune/base/optimization'	mathematical optimization/evolutionary algorithms
support vector machine (svm) classification	L4_artificial_intelligence_@_image_0_0	0 --> propose/machine/vector/support/base/support vector/classification/problem/vector machine/support vector machine'	mathematical optimization/evolutionary algorithms
fuzzy time series forecasting	L4_artificial_intelligence_@_image_0_15	0 --> series/time series/time/fuzzy/forecasting/fuzzy time/propose/fuzzy time series/forecast/base'	mathematical optimization/evolutionary algorithms
neural network decision making	L4_artificial_intelligence_@_image_0_103	0 --> fuzzy/problem/propose/base/network/datum/decision/neural/result/objective'	mathematical optimization/evolutionary algorithms
business intelligence	L4_artificial_intelligence_@_image_0_68	0 --> process/customer/business/decision/datum/result/propose/issue/service/market'	mathematical optimization/evolutionary algorithms
fuzzy logic and pattern recognition	L4_artificial_intelligence_@_image_0_90	0 --> fuzzy/base/rank/quality/fuzzy number/number/image/function/evaluation/recognition'	mathematical optimization/evolutionary algorithms
multi-objective scheduling	L4_artificial_intelligence_@_image_0_51	0 --> algorithm/problem/propose/resource/multi/objective/solution/scheduling/time/base'	mathematical optimization/evolutionary algorithms
molecular network analysis	L4_artificial_intelligence_@_image_0_24	0 --> index/graph/topological/topological index/degree/zagreb/network/vertex/molecular/chemical'	mathematical optimization/evolutionary algorithms
recommender systems	L4_artificial_intelligence_@_image_0_28	0 --> user/base/recommendation/propose/algorithm/system/datum/recommender/item/result'	mathematical optimization/evolutionary algorithms
cluster analysis	L4_artificial_intelligence_@_image_0_38/L4_artificial_intelligence_@_image_0_29	0 --> algorithm/base/propose/optimization/cluster/problem/datum/feature/network/result', '1 --> miss/value/imputation/miss value/datum/dataset/propose/cluster/data/method'	mathematical optimization/evolutionary algorithms
supply chain optimization	L4_artificial_intelligence_@_image_0_44/L4_artificial_intelligence_@_image_0_79	0 --> problem/chain/algorithm/supply/supply chain/route/propose/vehicle/solution/optimization', '1 --> datum/big/decision/big datum/algorithm/propose/process/base/supply/chain'	mathematical optimization/evolutionary algorithms
evolutionary computation	L4_artificial_intelligence_@_image_8_8/L4_artificial_intelligence_@_image_8_6/L4_artificial_intelligence_@_image_8_33/L4_artificial_intelligence_@_image_8_24/L4_artificial_intelligence_@_image_8_39	0 --> optimization/task/problem/evolutionary/propose/transfer/algorithm/search/knowledge/multi', '1 --> optimization/problem/algorithm/objective/surrogate/propose/evolutionary/solution/base/multi', '2 --> search/problem/algorithm/optimization/diversity/novelty/quality/evolutionary/solution/base', '3 --> es/cma/matrix/cma es/problem/strategy/evolution/adaptation/optimization/covariance', '4 --> al…	evolutionary algorithms/cybernetics/mathematical optimization
fuzzy neural networks	L4_artificial_intelligence_@_image_0_104	0 --> network/neural/neural network/datum/fuzzy/base/result/problem/algorithm/propose'	mathematical optimization/evolutionary algorithms
deep learning/neural network-based stock price prediction	L4_artificial_intelligence_@_image_0_3	0 --> stock/price/prediction/market/stock price/network/deep/stock market/neural/neural network'	mathematical optimization/evolutionary algorithms
search optimization	L4_artificial_intelligence_@_image_0_49	0 --> algorithm/problem/search/optimization/cs/propose/base/solution/result/assignment'	mathematical optimization/evolutionary algorithms
particle swarm optimization	L4_artificial_intelligence_@_image_0_84	0 --> algorithm/base/propose/optimization/problem/result/swarm/paper/particle/pso'	mathematical optimization/evolutionary algorithms
neural networks and fuzzy logic	L4_artificial_intelligence_@_image_0_66	0 --> network/base/propose/algorithm/fuzzy/datum/neural/neural network/result/machine'	mathematical optimization/evolutionary algorithms
credit risk analysis using machine learning	L4_artificial_intelligence_@_image_0_20	0 --> credit/scoring/credit scoring/base/ensemble/classifier/propose/risk/feature/credit risk'	mathematical optimization/evolutionary algorithms
medical ai/machine learning for heart disease prediction	L4_artificial_intelligence_@_image_0_7	0 --> disease/heart/heart disease/feature/machine/prediction/propose/accuracy/patient/algorithm'	mathematical optimization/evolutionary algorithms
optimization algorithms	L4_artificial_intelligence_@_image_0_92/L4_artificial_intelligence_@_image_0_17	0 --> algorithm/optimization/problem/propose/base/result/network/solution/improve/objective', '1 --> algorithm/problem/propose/optimization/base/solution/time/result/solve/paper'	mathematical optimization/evolutionary algorithms
software fault prediction	L4_artificial_intelligence_@_image_0_61	0 --> software/prediction/defect/fault/base/fault prediction/software fault/software fault prediction/model/ensemble'	mathematical optimization/evolutionary algorithms
fuzzy logic systems	L4_artificial_intelligence_@_image_0_45	0 --> fault/reliability/failure/base/fuzzy/tree/fault tree/safety/system/propose'	mathematical optimization/evolutionary algorithms
smart contract verification using solidity language on ethereum blockchain	L4_artificial_intelligence_@_image_1_6	0 --> contract/smart/smart contract/verification/solidity/language/blockchain/ethereum/level/verify'	machine learning/social info processing
quantum security	L4_artificial_intelligence_@_image_1_5	0 --> quantum/post/post quantum/security/scheme/csidh/base/attack/implementation/curve'	machine learning/social info processing
secure searchable storage and encryption	L4_artificial_intelligence_@_image_1_51	0 --> scheme/encryption/searchable/datum/search/forward/encrypt/access/secure/storage'	machine learning/social info processing
satisfiability modulo theories (smt)	L4_artificial_intelligence_@_image_1_14	0 --> level/word/word level/bit/smt/base/ic3/solver/smt solver/checking'	machine learning/social info processing
satisfiability (sat) solving	L4_artificial_intelligence_@_image_1_2	0 --> solver/sit/clause/solve/proof/float point/float/point/problem/formula'	machine learning/social info processing
markov decision processes (mdps)	L4_artificial_intelligence_@_image_1_87	0 --> markov/objective/probability/game/decision/problem/reachability/parameter/markov decision process/markov decision'	machine learning/social info processing
data privacy and security	L4_artificial_intelligence_@_image_1_99	0 --> privacy/user/app/ad/datum/website/policy/privacy policy/tracking/track'	machine learning/social info processing
secure multi-party computation	L4_artificial_intelligence_@_image_1_18	0 --> protocol/computation/secure/mpc/party/efficient/privacy/datum/base/round'	machine learning/social info processing
process mining	L4_artificial_intelligence_@_image_1_12	0 --> process/event/log/mining/process mining/datum/event log/technique/business/business process'	machine learning/social info processing
cryptography and security	L4_artificial_intelligence_@_image_1_10	0 --> leakage/security/channel/encryption/attack/scheme/authenticate/authenticate encryption/base/implementation'	machine learning/social info processing
cryptocurrency and blockchain technology	L4_artificial_intelligence_@_image_1_16	0 --> payment/network/channel/payment channel/lightning/blockchain/path/lightning network/scalability/channel network'	machine learning/social info processing
steganalysis and steganography	L4_artificial_intelligence_@_image_1_63	0 --> steganalysis/feature/image/network/channel/selection/selection channel/steganography/base/embed'	machine learning/social info processing
algorithm selection	L4_artificial_intelligence_@_image_8_30	0 --> algorithm/problem/landscape/feature/optimization/performance/set/instance/selection/algorithm selection'	evolutionary algorithms/cybernetics/mathematical optimization
large scale optimization algorithms	L4_artificial_intelligence_@_image_8_27	0 --> problem/optimization/algorithm/scale/large/large scale/propose/base/variable/solve'	evolutionary algorithms/cybernetics/mathematical optimization
evolutionary computation/genetic algorithms	L4_artificial_intelligence_@_image_8_23	0 --> algorithm/objective/base/optimization/optimisation/multi/problem/population/distribution/estimation'	evolutionary algorithms/cybernetics/mathematical optimization
multi-objective evolutionary optimization	L4_artificial_intelligence_@_image_8_2	0 --> objective/algorithm/problem/optimization/base/propose/evolutionary/solution/multi/objective optimization'	evolutionary algorithms/cybernetics/mathematical optimization
multi-objective evolutionary algorithms (moeas)	L4_artificial_intelligence_@_image_8_20	0 --> objective/problem/moea/evolutionary/space/algorithm/diversity/multi objective/base/subproblem'	evolutionary algorithms/cybernetics/mathematical optimization
evolutionary computation/artificial evolution	L4_artificial_intelligence_@_image_8_4	0 --> algorithm/mutation/runtime/evolutionary/parameter/problem/size/crossover/ea/rate'	evolutionary algorithms/cybernetics/mathematical optimization
multi-objective optimization algorithms	L4_artificial_intelligence_@_image_8_12	0 --> dynamic/objective/optimization/algorithm/multi/multi objective/propose/base/problem/change'	evolutionary algorithms/cybernetics/mathematical optimization
genetic programming	L4_artificial_intelligence_@_image_8_18	0 --> regression/symbolic/symbolic regression/gp/genetic/programming/genetic programming/algorithm/problem/expression'	evolutionary algorithms/cybernetics/mathematical optimization
particle swarm optimization (pso)	L4_artificial_intelligence_@_image_8_46	0 --> particle/swarm/pso/particle swarm/algorithm/optimization/problem/topology/swarm optimization/particle swarm optimization'	evolutionary algorithms/cybernetics/mathematical optimization
cryptographic artificial intelligence	L4_artificial_intelligence_@_image_8_49	0 --> function/boolean/boolean function/cryptographic/property/hash/evolutionary/box/hash function/algorithm'	evolutionary algorithms/cybernetics/mathematical optimization
heuristic optimization	L4_artificial_intelligence_@_image_8_9	0 --> heuristic/problem/algorithm/hyper/hyper heuristic/optimization/propose/objective/base/test'	evolutionary algorithms/cybernetics/mathematical optimization
optimization in continuous space	L4_artificial_intelligence_@_image_8_44	0 --> test/search/program/optimization/objective/problem/space/continuous/interaction/latent'	evolutionary algorithms/cybernetics/mathematical optimization
differential evolution optimization	L4_artificial_intelligence_@_image_8_25	0 --> evolution/differential/differential evolution/algorithm/parameter/strategy/mutation/base/propose/optimization'	evolutionary algorithms/cybernetics/mathematical optimization
scheduling and optimization	L4_artificial_intelligence_@_image_8_7	0 --> scheduling/rule/problem/heuristic/genetic/programming/shop/genetic programming/propose/dynamic'	evolutionary algorithms/cybernetics/mathematical optimization
evolutionary multi-objective optimization	L4_artificial_intelligence_@_image_8_10	0 --> objective/problem/space/optimization/multi/solution/decision/algorithm/evolutionary/pareto'	evolutionary algorithms/cybernetics/mathematical optimization
multi-objective evolutionary algorithms (moea)	L4_artificial_intelligence_@_image_8_26	0 --> objective/problem/multi/base/multi objective/optimization/evolutionary/algorithm/moea/pareto'	evolutionary algorithms/cybernetics/mathematical optimization
brain storm optimization (bso)	L4_artificial_intelligence_@_image_8_36	0 --> algorithm/optimization/problem/base/strategy/propose/bso/solution/brain/brain storm'	evolutionary algorithms/cybernetics/mathematical optimization
reinforcement learning	L4_artificial_intelligence_@_image_8_21	0 --> xcs/classifier/reward/learn/rule/problem/base/learning/policy/error'	evolutionary algorithms/cybernetics/mathematical optimization
crowd anomaly detection	L4_artificial_intelligence_@_image_4_24	0 --> video/detection/crowd/anomaly/feature/propose/base/anomaly detection/abnormal/network'	applications of computer vision/computer vision/image processing
image quality assessment (iqa)	L4_artificial_intelligence_@_image_4_17	0 --> image/quality/propose/network/image quality/feature/base/assessment/quality assessment/iqa'	applications of computer vision/computer vision/image processing
object detection	L4_artificial_intelligence_@_image_4_16/L4_artificial_intelligence_@_image_4_181	0 --> detection/object/feature/network/propose/object detection/detector/pedestrian/base/performance', '1 --> shadow/detection/propose/shadow detection/object/base/image/foreground/result/feature'	applications of computer vision/computer vision/image processing
action recognition	L4_artificial_intelligence_@_image_4_23	0 --> action/video/temporal/network/feature/recognition/propose/action recognition/spatial/representation'	applications of computer vision/computer vision/image processing
object pose estimation	L4_artificial_intelligence_@_image_4_201	0 --> pose/object/estimation/pose estimation/3d/6d/rgb/propose/object pose/image'	applications of computer vision/computer vision/image processing
deep learning for image classification	L4_artificial_intelligence_@_image_4_33	0 --> network/image/neural/propose/deep/neural network/feature/classification/base/method'	applications of computer vision/computer vision/image processing
noise filtering algorithms	L4_artificial_intelligence_@_image_4_195	0 --> image/filter/color/propose/bilateral/base/noise/filtering/algorithm/fast'	applications of computer vision/computer vision/image processing
multiple object tracking	L4_artificial_intelligence_@_image_4_6	0 --> object/track/tracking/detection/multi/object track/propose/mot/multiple/target'	applications of computer vision/computer vision/image processing
fingerprint detection and feature extraction	L4_artificial_intelligence_@_image_4_272	0 --> fingerprint/image/quality/propose/detection/feature/base/attack/performance/result'	applications of computer vision/computer vision/image processing
knowledge transfer in computer vision	L4_artificial_intelligence_@_image_4_49	0 --> knowledge/distillation/teacher/student/network/task/knowledge distillation/transfer/propose/train'	applications of computer vision/computer vision/image processing
deep visual sentiment analysis	L4_artificial_intelligence_@_image_4_0	0 --> image/propose/network/feature/base/visual/video/deep/sentiment/emotion'	applications of computer vision/computer vision/image processing
video compression and encoding	L4_artificial_intelligence_@_image_4_108	0 --> code/video/propose/mode/hevc/base/content/efficiency/video code/complexity'	applications of computer vision/computer vision/image processing
facial attribute recognition	L4_artificial_intelligence_@_image_4_30	0 --> face/image/age/facial/attribute/propose/network/expression/face image/generate'	applications of computer vision/computer vision/image processing
deep learning for face recognition	L4_artificial_intelligence_@_image_4_306	0 --> iris/recognition/image/propose/network/base/face/feature/deep/learning'	applications of computer vision/computer vision/image processing
multi-object classification with attention-based feature learning	L4_artificial_intelligence_@_image_4_112	0 --> image/label/propose/network/multi/classification/object/attention/learn/feature'	applications of computer vision/computer vision/image processing
convolutional neural networks (cnns) for image classification	L4_artificial_intelligence_@_image_4_70	0 --> texture/image/network/feature/deep/convolutional/classification/propose/base/cnn'	applications of computer vision/computer vision/image processing
deep image retrieval	L4_artificial_intelligence_@_image_4_91	0 --> image/feature/propose/base/retrieval/network/deep/dataset/image retrieval/result'	applications of computer vision/computer vision/image processing
object recognition and detection	L4_artificial_intelligence_@_image_4_469	0 --> table/image/document/dataset/detection/network/recognition/propose/base/structure'	applications of computer vision/computer vision/image processing
360 degree video streaming quality enhancement	L4_artificial_intelligence_@_image_4_48	0 --> video/quality/360/user/streaming/propose/base/network/experience/degree'	applications of computer vision/computer vision/image processing
handwritten character recognition using neural networks	L4_artificial_intelligence_@_image_4_90	0 --> recognition/handwritten/character/network/propose/dataset/text/neural network/neural/base'	applications of computer vision/computer vision/image processing
domain adaptation	L4_artificial_intelligence_@_image_4_26	0 --> domain/adaptation/domain adaptation/target/source/feature/target domain/propose/distribution/transfer'	applications of computer vision/computer vision/image processing
facial expression recognition (fer)	L4_artificial_intelligence_@_image_4_13	0 --> expression/facial/facial expression/recognition/expression recognition/feature/facial expression recognition/fer/network/propose'	applications of computer vision/computer vision/image processing
pedestrian detection	L4_artificial_intelligence_@_image_4_79	0 --> detection/image/pedestrian/propose/network/base/feature/dataset/object/pedestrian detection'	applications of computer vision/computer vision/image processing
lifelong neural network continual learning	L4_artificial_intelligence_@_image_4_575	0 --> task/learn/learning/continual/network/continual learning/catastrophic/neural/lifelong/neural network'	applications of computer vision/computer vision/image processing
rgb-nir image processing	L4_artificial_intelligence_@_image_4_69	0 --> color/image/camera/nir/rgb/propose/filter/rgb nir/light/base'	applications of computer vision/computer vision/image processing
real-time semantic segmentation of roads	L4_artificial_intelligence_@_image_4_604	0 --> segmentation/semantic/network/semantic segmentation/road/propose/feature/time/real/real time'	applications of computer vision/computer vision/image processing
image dehazing	L4_artificial_intelligence_@_image_4_144	0 --> image/haze/dehazing/propose/transmission/dehaze/base/algorithm/hazy/channel'	applications of computer vision/computer vision/image processing
face anti-spoofing detection	L4_artificial_intelligence_@_image_4_20	0 --> spoof/attack/face/iris/detection/anti/anti spoof/face anti/face anti spoof/presentation'	applications of computer vision/computer vision/image processing
crowd counting and density estimation	L4_artificial_intelligence_@_image_4_160	0 --> crowd/network/count/propose/image/feature/density/scale/crowd count/dataset'	applications of computer vision/computer vision/image processing
3d shape retrieval	L4_artificial_intelligence_@_image_4_10	0 --> 3d/shape/image/network/3d shape/propose/base/object/learn/retrieval'	applications of computer vision/computer vision/image processing
mobile edge deep learning inference	L4_artificial_intelligence_@_image_4_52	0 --> device/inference/mobile/deep/learning/dnn/network/model/resource/edge'	applications of computer vision/computer vision/image processing
zero-shot learning in visual semantics	L4_artificial_intelligence_@_image_4_5	0 --> class/zsl/semantic/zero/zero shot/shot/learn/unseen/visual/see'	applications of computer vision/computer vision/image processing
deep learning-based object detection	L4_artificial_intelligence_@_image_4_135	0 --> detection/object/image/network/vehicle/resolution/deep/propose/base/object detection'	applications of computer vision/computer vision/image processing
pavement crack detection	L4_artificial_intelligence_@_image_4_58	0 --> crack/detection/crack detection/pavement/network/propose/segmentation/image/pavement crack'	applications of computer vision/computer vision/image processing
image classification learning algorithms	L4_artificial_intelligence_@_image_4_115	0 --> propose/image/method/base/learn/classification/learning/dictionary/datum/algorithm'	applications of computer vision/computer vision/image processing
deep learning with neural networks	L4_artificial_intelligence_@_image_4_64	0 --> network/learning/training/neural/propose/neural network/datum/layer/learn/neuron'	applications of computer vision/computer vision/image processing
pedestrian trajectory prediction	L4_artificial_intelligence_@_image_4_105	0 --> trajectory/prediction/pedestrian/trajectory prediction/propose/interaction/agent/human/dataset/predict'	applications of computer vision/computer vision/image processing
low rank tensor completion	L4_artificial_intelligence_@_image_4_161	0 --> tensor/rank/low/completion/low rank/propose/norm/tensor completion/problem/matrix'	applications of computer vision/computer vision/image processing
deep neural network image reconstruction methods	L4_artificial_intelligence_@_image_4_22	0 --> network/image/reconstruction/propose/deep/base/method/measurement/neural/cs'	applications of computer vision/computer vision/image processing
monocular depth estimation	L4_artificial_intelligence_@_image_4_110	0 --> depth/image/propose/network/estimation/depth estimation/monocular/base/map/scene'	applications of computer vision/computer vision/image processing
video object segmentation	L4_artificial_intelligence_@_image_4_39	0 --> segmentation/video/object/object segmentation/video object/video object segmentation/frame/propose/vos/network'	applications of computer vision/computer vision/image processing
deep learning for image retrieval	L4_artificial_intelligence_@_image_4_29	0 --> image/propose/hash/feature/learn/retrieval/base/deep/network/method'	applications of computer vision/computer vision/image processing
move object detection	L4_artificial_intelligence_@_image_4_467	0 --> move/object/move object/detection/video/propose/base/move object detection/object detection/motion'	applications of computer vision/computer vision/image processing
object detection and tracking	L4_artificial_intelligence_@_image_4_102	0 --> object/detection/base/feature/propose/algorithm/tracking/performance/vehicle/dataset'	applications of computer vision/computer vision/image processing
deep learning for image reconstruction	L4_artificial_intelligence_@_image_4_571	0 --> image/network/propose/deep/base/reconstruction/cnn/learning/feedback/moment'	applications of computer vision/computer vision/image processing
deep learning for adversarial attacks on image networks	L4_artificial_intelligence_@_image_4_9	0 --> adversarial/attack/network/image/example/propose/deep/adversarial example/neural/model'	applications of computer vision/computer vision/image processing
image denoising	L4_artificial_intelligence_@_image_4_85	0 --> noise/image/denoise/denoising/network/propose/image denoise/level/noisy/base'	applications of computer vision/computer vision/image processing
gaze estimation	L4_artificial_intelligence_@_image_4_19	0 --> gaze/eye/estimation/image/propose/gaze estimation/base/network/dataset/pupil'	applications of computer vision/computer vision/image processing
food image recognition	L4_artificial_intelligence_@_image_4_63	0 --> food/image/food image/recognition/ingredient/recipe/network/propose/base/feature'	applications of computer vision/computer vision/image processing
gait recognition	L4_artificial_intelligence_@_image_4_67	0 --> gait/recognition/feature/gait recognition/propose/network/base/dataset/video/human'	applications of computer vision/computer vision/image processing
deep learning for image recognition	L4_artificial_intelligence_@_image_4_73	0 --> detection/network/image/propose/recognition/dataset/base/deep/neural/learning'	applications of computer vision/computer vision/image processing
video surveillance	L4_artificial_intelligence_@_image_4_132	0 --> image/propose/feature/base/network/result/attention/noise/method/video'	applications of computer vision/computer vision/image processing
semantic image annotation and learning	L4_artificial_intelligence_@_image_4_87	0 --> image/propose/tag/social/network/annotation/base/label/learn/semantic'	applications of computer vision/computer vision/image processing
image captioning	L4_artificial_intelligence_@_image_4_7	0 --> image/caption/image caption/captioning/image captioning/attention/generate/language/propose/visual'	applications of computer vision/computer vision/image processing
sign language recognition	L4_artificial_intelligence_@_image_4_12	0 --> sign/language/sign language/recognition/language recognition/sign language recognition/network/dataset/propose/base'	applications of computer vision/computer vision/image processing
plant species recognition and identification	L4_artificial_intelligence_@_image_4_119	0 --> plant/leaf/image/specie/leave/dataset/identification/plant specie/recognition/network'	applications of computer vision/computer vision/image processing
salient object detection	L4_artificial_intelligence_@_image_4_203	0 --> saliency/salient/detection/object/salient object/saliency detection/feature/image/propose/network'	applications of computer vision/computer vision/image processing
motion prediction in high-efficiency video coding (hevc)	L4_artificial_intelligence_@_image_4_84	0 --> code/video/video code/rate/propose/hevc/motion/high/prediction/base'	applications of computer vision/computer vision/image processing
face recognition	L4_artificial_intelligence_@_image_4_34	0 --> face/image/recognition/feature/propose/base/face recognition/quality/algorithm/result'	applications of computer vision/computer vision/image processing
deep learning for image analysis	L4_artificial_intelligence_@_image_4_89	0 --> image/art/propose/feature/dataset/network/base/deep/word/document'	applications of computer vision/computer vision/image processing
audio classification using convolutional neural networks	L4_artificial_intelligence_@_image_4_167	0 --> network/feature/audio/classification/propose/sound/neural/neural network/base/cnn'	applications of computer vision/computer vision/image processing
object tracking and motion analysis	L4_artificial_intelligence_@_image_4_71	0 --> point/propose/base/image/tracking/motion/feature/structure/object/algorithm'	applications of computer vision/computer vision/image processing
spike-based neural network learning	L4_artificial_intelligence_@_image_4_72	0 --> spike/network/neural/neural network/snn/propose/spike neural/spike neural network/learning/base'	applications of computer vision/computer vision/image processing
